# Supplementary material
Source: publisher site journal article supplement (https://www.dovepress.com/article/445805)
Supplement: Supplementary file 1 [file get_supplementary_file.php]

*Supplementary Information for*

**Copper-based single-atom nanozyme system mimicking platelet cells for enhancing the outcome of** **radioimmunotherapy**

Cheng Chen1, Nandi Chen2, 3, Yan Qi1, Meng Lyu2, Chaoyan Wu4, Conghua Xie1*, Haijun Yu1*

1 Department of Radiation and Medical Oncology, Hubei Province Cancer Clinical Study Center, Hubei Key Laboratory of Tumor Biological Behaviors, Zhongnan Hospital of Wuhan University, Wuhan, 430071, Hubei, China.

2 Department of Gastrointestinal Surgery & Department of Geriatrics, Shenzhen People’s Hospital (The Second Clinical Medical College, Jinan University, The First Affiliated Hospital, Southern University of Science and Technology), Shenzhen, 518020, Guangdong, China.

3 Analysis and Testing Center, Shenzhen Technology University, Shenzhen 518118, China.

4 Department of Integrated Traditional Chinese Medicine and Western Medicine, Zhongnan Hospital of Wuhan University, Wuhan, 430071, Hubei, China.

4

5

*: Corresponding author

Corresponding author: Haijun Yu ([haijunyu@whu.edu.cn](mailto:haijunyu@whu.edu.cn)), Conghua Xie ([chxie_65@whu.edu.cn](mailto:chxie_65@whu.edu.cn))

Cheng Chen, Nandi Chen, Yan Qi and Chaoyan Wu contributed equally to this work.

**Supplementary methods.**

**Experimental Procedures**

**Materials and reagents**

2′,7′-Dichlorofluorescin diacetate (DCFH-DA), ATP assay kit and HMGB1 ELISA kit was purchased from Beijing Solarbio Science & Technology Co., Ltd. (China). All of the aqueous solutions were prepared using purified deionized (DI) water purified with a purification system (Direct-Q3, Millipore, USA). Antibodies for Calreticulin (CRT) was purchased from Beyotime Institute of Biotechnology (China). The other solvents used in this work were purchased from Sinopharm Chemical Reagent (China) and Aladdin-Reagent (China).

**Cell culture**

The4T1 cancer cell line was obtained from the Cell Bank of the Chinese Academy of Sciences and incubated in RPMI-1640 medium supplemented with 10% FBS in a humidified atmosphere at 37 °C.

**Preparation and characterization of Cu** **SAZs**

Cu SAZs were fabricated through a pyrolysis method using polydopamine nanoparticles (PDA) as a carbon source according to the literature1. Dopamine hydrochloride (0.5 g) was dissolved in a 100 mL mixture of water and ethanol (volume ratio 1:1). After stirring vigorously for 0.5 h, 3.0 mL concentrated ammonia was added, and the mixture was stirred for 2 h. The PDA nanoparticles were then centrifuged and washed with ethanol six times, followed by freeze-drying for at least 12 hours. The PDA products were dispersed in 10 mL water (10 mg/mL). Then, 1.5 mg CuCl2·2H2O was added to the PDA solution under stirring. The solution was then stirred for 12 h at room temperature. Products in this step were collected by centrifugation and 12 h freeze-drying. Cu SAzyme was obtained by heating these powders at 600 ℃ for 4 hours (5 ℃/min) under an Ar atmosphere. Transmission electron microscopy (TEM) was recorded using an FEI Tecnai G2 S-Twin with a field emission gun operating at 200 kV. The copper single atom content was measured by ICP–AES. The size distribution and zeta potential of different formulations were measured by dynamic light scattering (DLS). The morphological structures of different formulations were observed by TEM (JEOL-2100).

***In vitro* cancer targeting study**

4T1 cells were seeded in 24-well plates and cultured for 12 h. Then, 100 μL DiO labeled of RC or PC (containing 0.1 mg/mL Cu SAZs) was added to the medium. Then, the cells were incubated for 2 h at 37 °C and 5% CO2 and washed with PBS three times. The cells were then harvested, stained with DAPI and imaged by using a fluorescence microscope (IX81, Olympus, Japan).

**Biosafety evaluation**

Healthy mice were injected with PC (5 mg/kg) through tail vein. After 30 days, blood samples were collected for blood routine analysis. Main organs were collected for HE staining. *p < 0.05 (significant), **p < 0.01 (moderately significant), and ***p < 0.001 (highly significant), respectively.

**Biodistribution**

To investigate biodistribution of RC/PC in mice, tumor bearing mice received injection of RC/PC (5mg/kg). 24 h post injection, mice were sacrificed. Tumors and main organs were harvest and cut into small pieced for aqua regia digestion. ICP-MS was applied for Cu content analysis.

**Statistical analysis**

All data were presented as SD ± Mean. Data were analyzed by Graphpad Prism 8 software using ANOVA with Tukey's post-test used for statistical analysis.


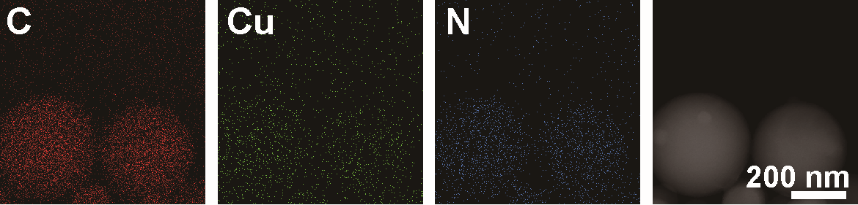


**Figure S1.** Element mapping of PC.


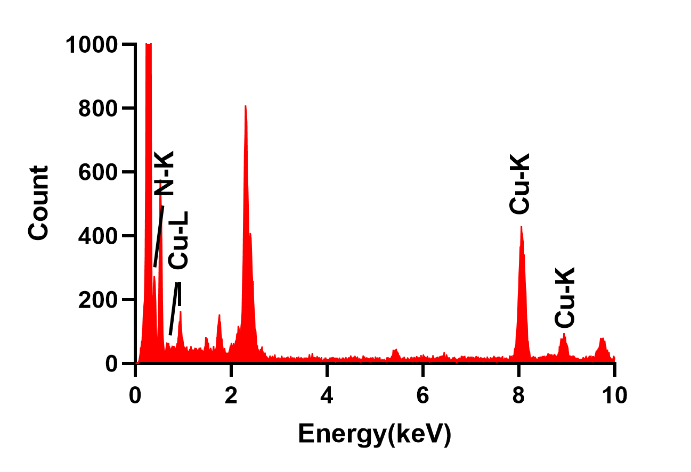


**Figure S2.** EDX spectrum of PC.


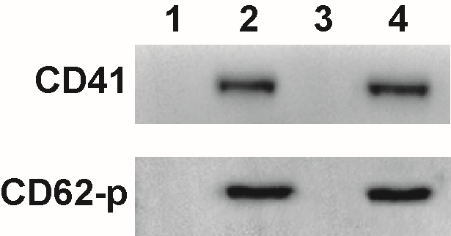


**Figure S3.** WB analysis in four groups (1:Red blood cell membrane; 2: Platelet cell membrane; 3:RC; 4:PC).


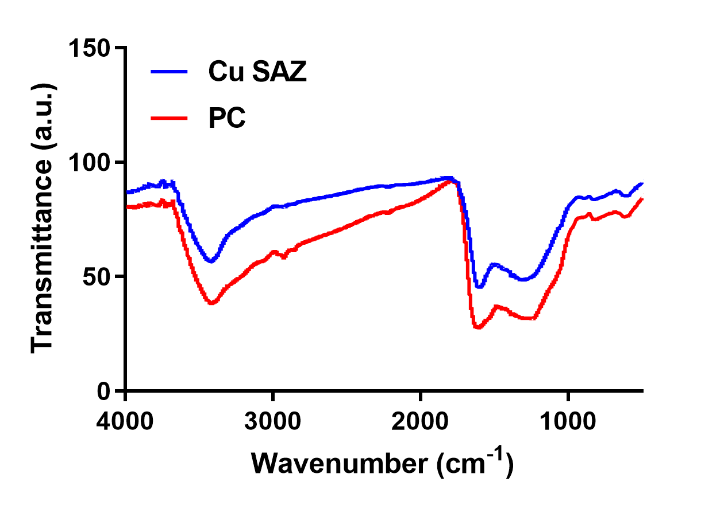


**Figure S4.** FTIR pattern of Cu SAZ and PC.

**
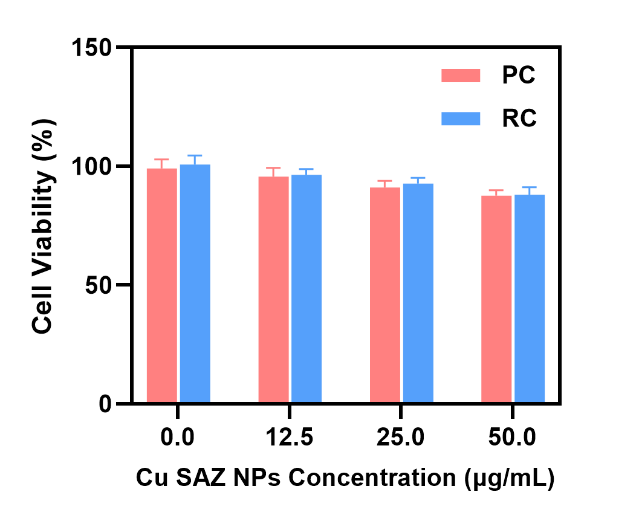
**

**Figure S5.** MCF-10A cell viability following treatments of various concentrations of PC and RC NPs.


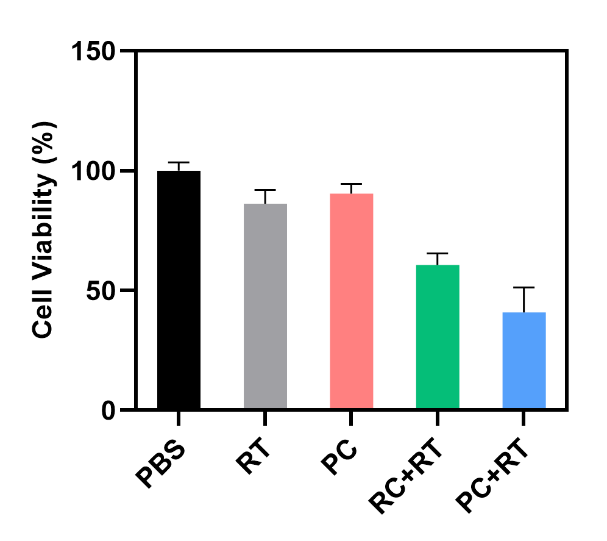


**Figure S6.** Cell viability in various treatment groups.

**
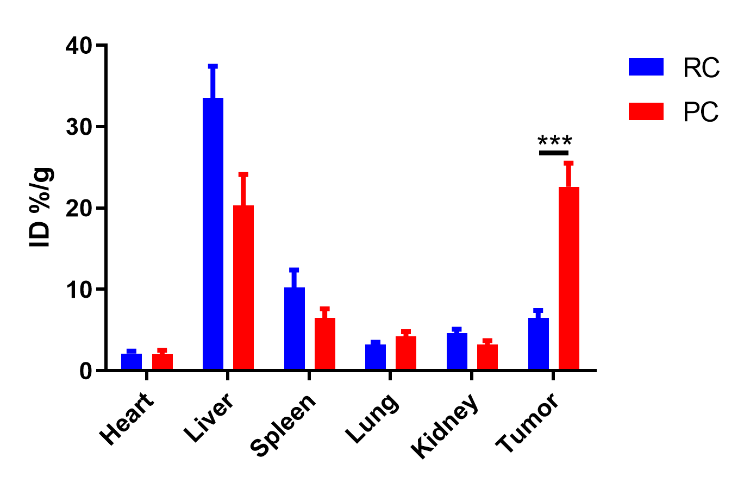
**

**Figure S7.** Biodistribution in mice 24 h post injection of RC or PC. One-way ANOVA for multiple groups were applied for statistical analysis. ***p < 0.001.

**
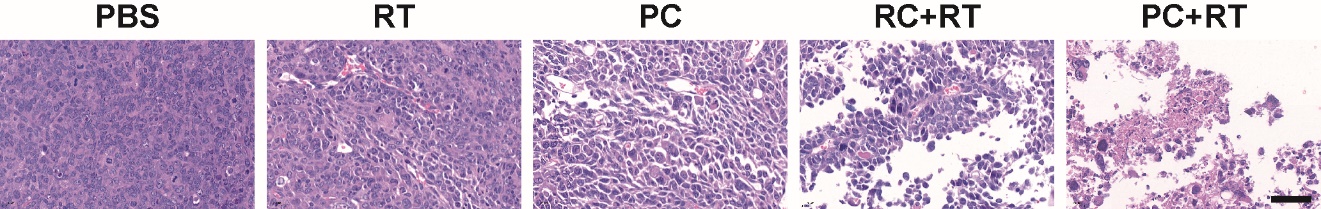
**

**Figure S8.** Representative images of HE staining of tumor slices in various treatment groups (Scale bar: 50 μm).

**References**

1. Zhu D, Ling R, Chen H, et al. Biomimetic copper single-atom nanozyme system for self-enhanced nanocatalytic tumor therapy. *Nano Research.* 2022;15:7320-7328.
